# Supplementary material for: Enhanced nuclear translation is associated with proliferation and progression across multiple cancers
Source: PubMed Central journal article supplement (PMC10104727; doi:10.1002/mco2.248), 2023-04-14
Supplement: MCO2-4-e248-s001.pdf [file MCO2-4-e248-s001.pdf]

**Enhanced nuclear translation is associated with proliferation and  
progression across multiple cancers**

Sailan Zou<sup>1,#</sup>, Byung-Wook Kim<sup>2,#</sup>, Yan Tian<sup>1,#</sup>, Geng Liu<sup>1</sup>, Jiawei Zhang<sup>2,3</sup>,  
Ricardo Zerda<sup>4</sup>, Zhuo Li<sup>4</sup>, Guixiang Zhang<sup>5</sup>, Xiao Du<sup>5,6</sup>, Weiqiang Lin<sup>7</sup>, Xiang  
Gao<sup>8</sup>, Wendong Huang<sup>2,\*</sup>, Xianghui Fu<sup>1,\*</sup>

<sup>1</sup>Division of Endocrinology and Metabolism, State Key Laboratory of Biotherapy and Cancer Center, West China Hospital, Sichuan University and Collaborative Innovation Center of Biotherapy, Chengdu 610041, Sichuan, China.

<sup>2</sup>Department of Diabetes Complications and Metabolism, Arthur Riggs Diabetes and Metabolism Research Institute | Irell & Manella Graduate School of Biological Sciences, Beckman Research Institute, City of Hope National Medical Center, Duarte, CA 91010, USA.

<sup>3</sup>Cancer Institute (Key Laboratory of Cancer Prevention and Intervention, China National Ministry of Education), Second Affiliated Hospital, School of Medicine, Zhejiang University, 310009, Hangzhou, China.

<sup>4</sup>Electron Microscopy and Atomic Force Microscopy Core, City of Hope National Medical Center, Duarte, CA 91010, USA.

<sup>5</sup>Division of Gastrointestinal Surgery, Department of General Surgery and Gastric Cancer Center, West China Hospital, Sichuan University, Chengdu 610041, Sichuan, China.

<sup>6</sup>Department of General Surgery, Yaan People's Hospital, Yaan 625000, Sichuan, China.

<sup>7</sup>Department of Nephrology, The Fourth Affiliated Hospital, International Institutes of Medicine, School of Medicine, Zhejiang University, 310009, Zhejiang, China.

<sup>8</sup>Department of Neurosurgery and Institute of Neurosurgery, State Key

Laboratory of Biotherapy and Cancer Center, West China Hospital, West China Medical School, Sichuan University and Collaborative Innovation Center for Biotherapy, Chengdu 610041, Sichuan, China.

#These three authors contributed equally.

\*Correspondence: [whuang@coh.org](mailto:whuang@coh.org) (W.H.), [xfu@scu.edu.cn](mailto:xfu@scu.edu.cn) (X.F.).

Email address: [zsl96hn@163.com](mailto:zsl96hn@163.com) (S.Z.), [BKim@coh.org](mailto:BKim@coh.org) (B.Kim.), [tyfxh@163.com](mailto:tyfxh@163.com) (Y.T.), [liu2geng6@163.com](mailto:liu2geng6@163.com) (G.L.), [jwzhang@zju.edu.cn](mailto:jwzhang@zju.edu.cn) (J.Z.), [rzerda@coh.org](mailto:rzerda@coh.org) (R.Z.), [zhouli@coh.org](mailto:zhouli@coh.org) (Z.L.), [zhangguixiang@wchscu.cn](mailto:zhangguixiang@wchscu.cn) (G.Z.), [Duxiao\\_home@163.com](mailto:Duxiao_home@163.com) (X.D.), [wlin@zju.edu.cn](mailto:wlin@zju.edu.cn) (W.L.), [xianggao@scu.edu.cn](mailto:xianggao@scu.edu.cn) (X.G.).

# Figure S1

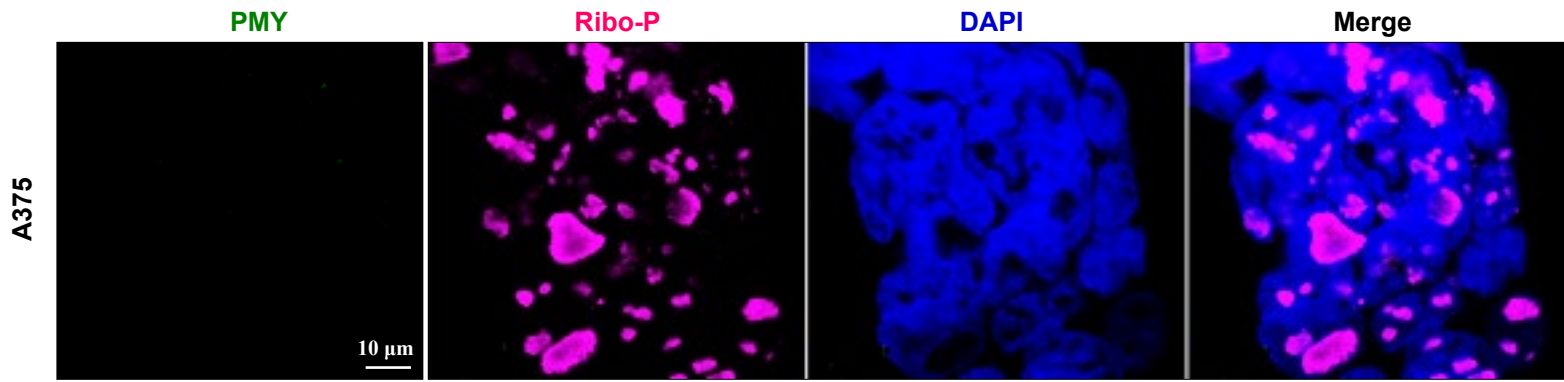

**Figure S1. Verification of RPM analysis.**

A375 cells without puromycin (PMY) treatment have no signal.

## Figure S2

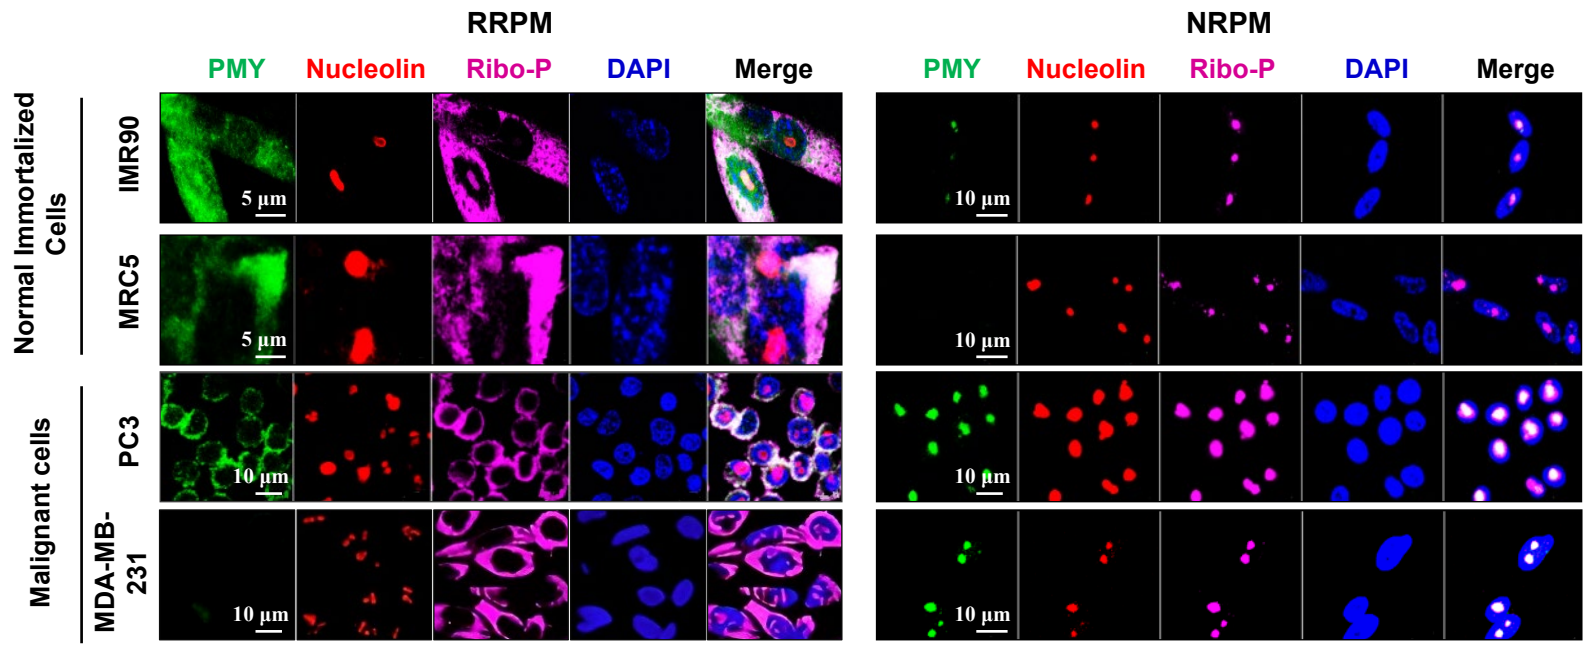

**Figure S2. Regular RPM (RRPM) and nuclear RPM (NRPM) detect cytoplasmic and nuclear translation, respectively.**

Normal immortalized cells (IMR90 and MRC5) and malignant cancer cells (PC3 and MDA-231) were used for regular RPM (RRPM) and nuclear RPM (NRPM), respectively. Nuclei are counterstained with DAPI.

**Figure S3**

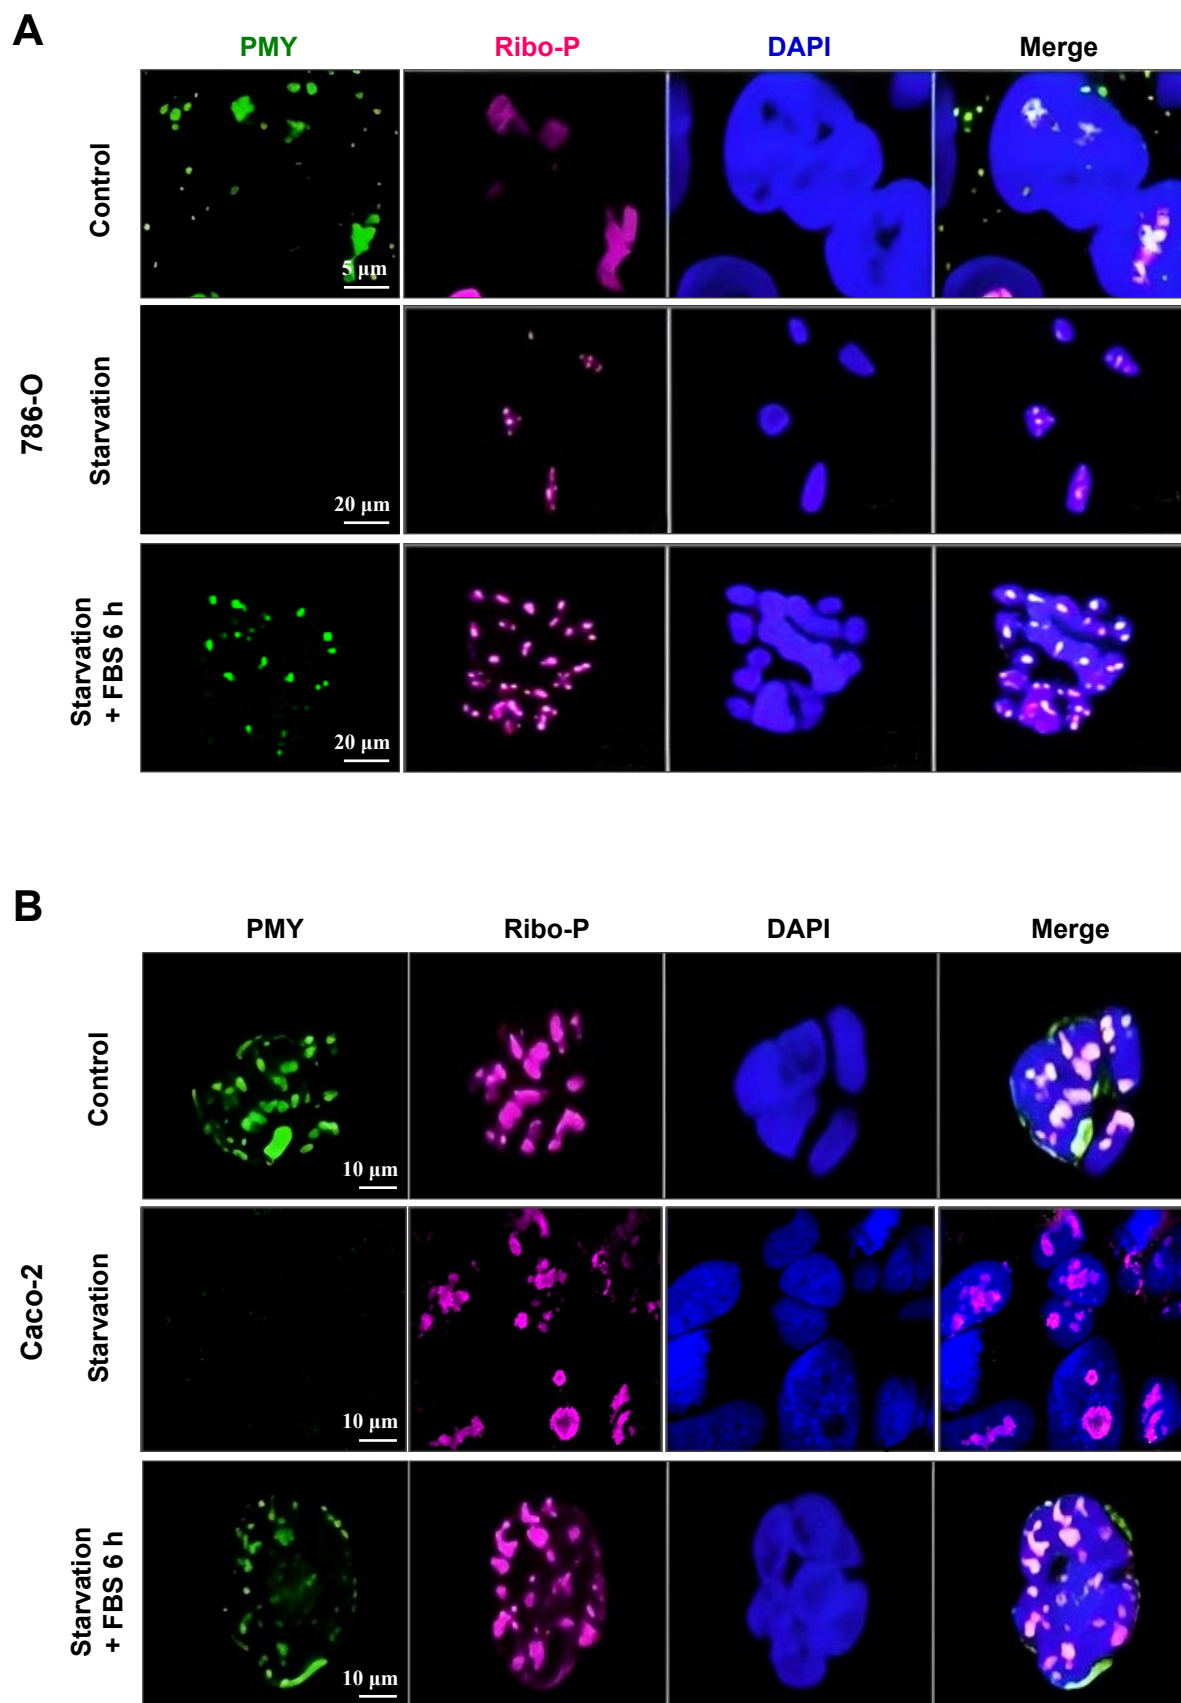

**Figure S3. Nuclear translation detected by NRPM in various malignant cancer cell lines with or without serum starvation.**

Starvation + FBS 6 h: cells were treated with serum starvation for 48 hours prior to FBS re-supplementation for 6 hours.

# Figure S3

## C

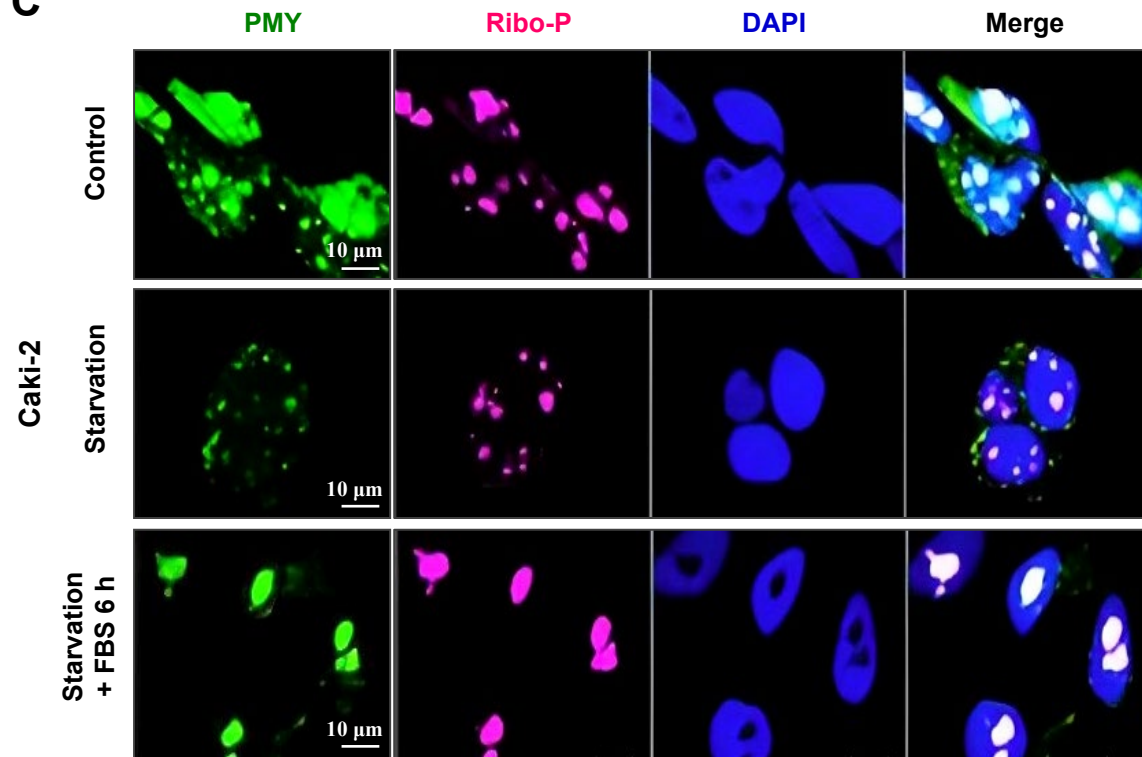

## D

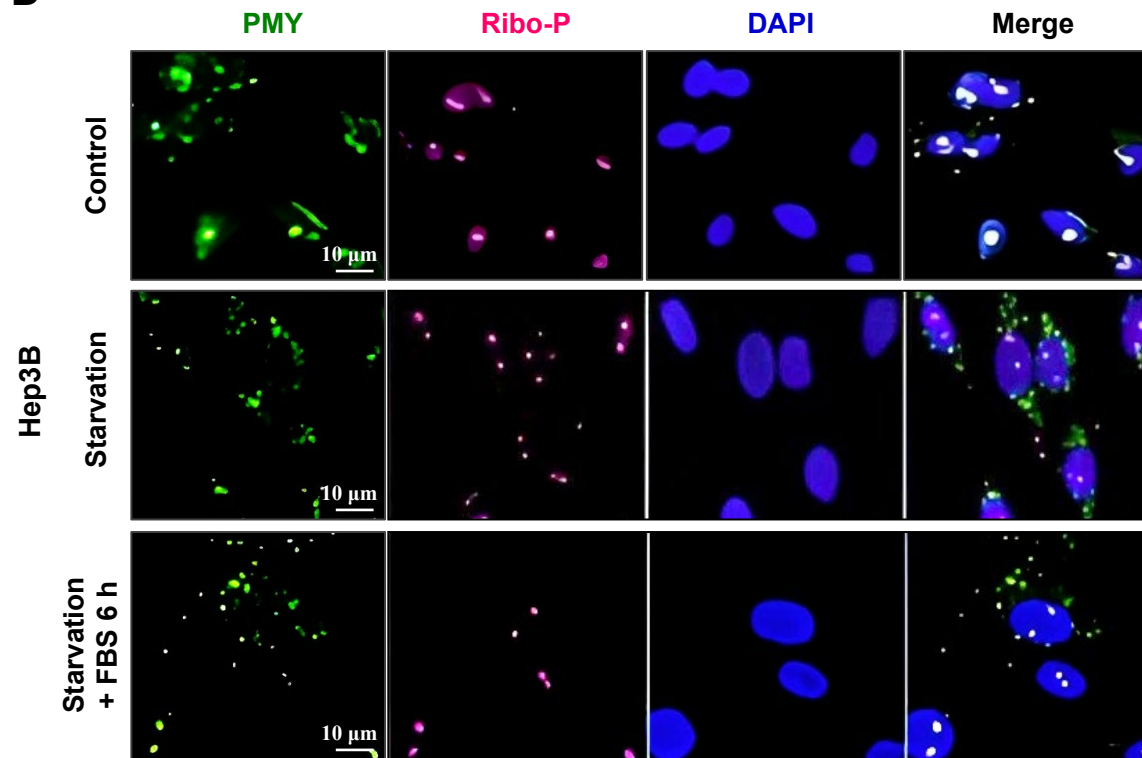

**Figure S3. Nuclear translation detected by NRPM in various malignant cancer cell lines with or without serum starvation.**

Starvation + FBS 6 h: cells were treated with serum starvation for 48 hours prior to FBS re-supplementation for 6 hours.

# Figure S3

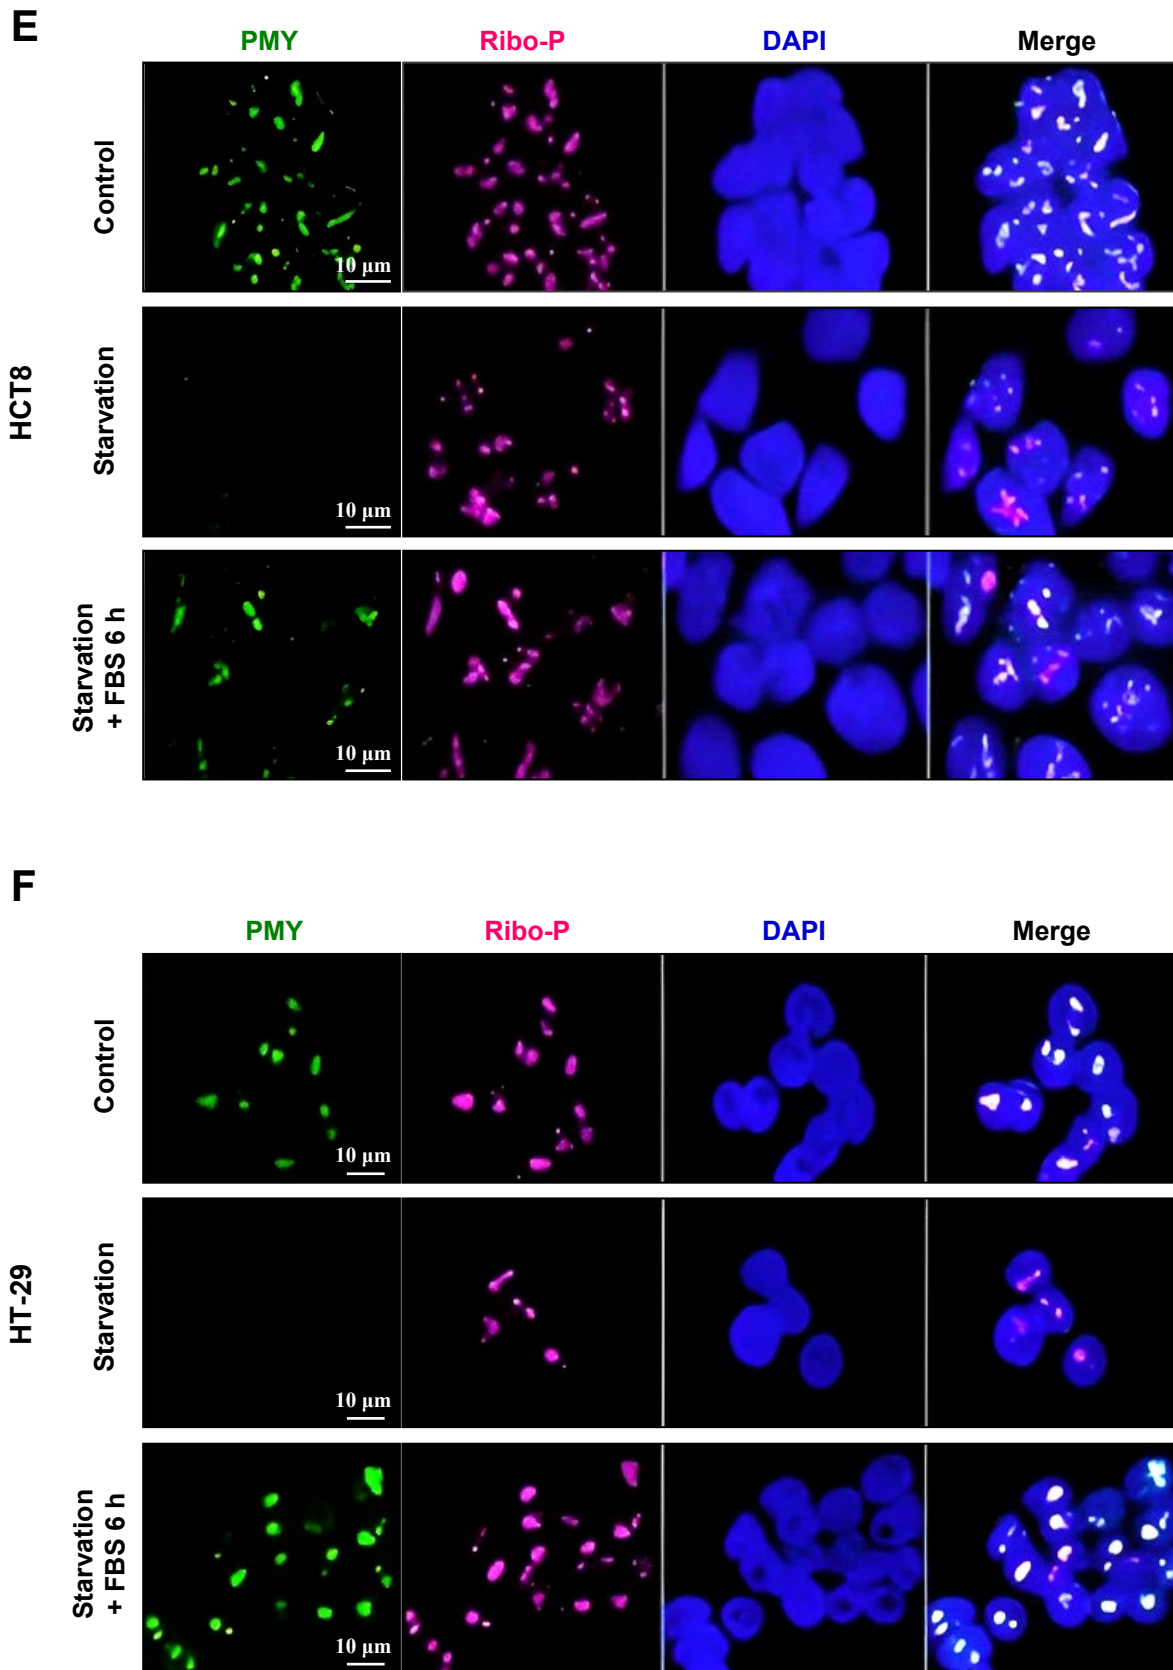

**Figure S3. Nuclear translation detected by NRPM in various malignant cancer cell lines with or without serum starvation.**

Starvation + FBS 6 h: cells were treated with serum starvation for 48 hours prior to FBS re-supplementation for 6 hours.

# Figure S3

## G

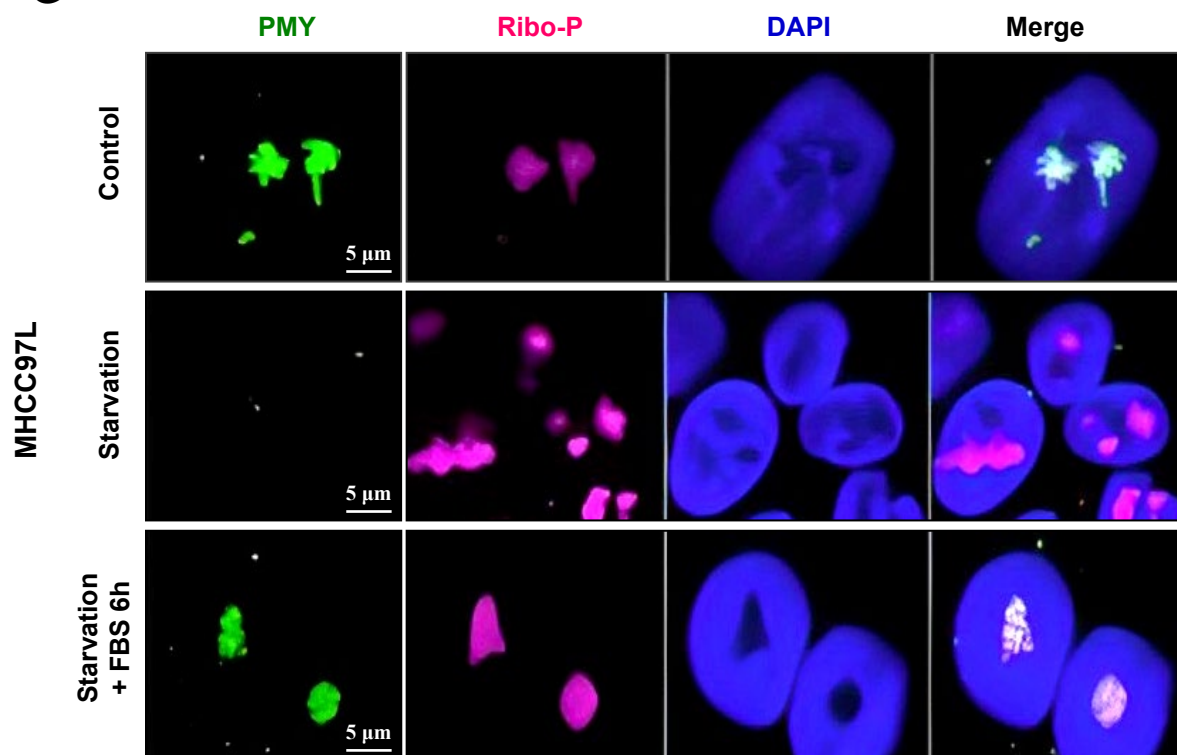

## H

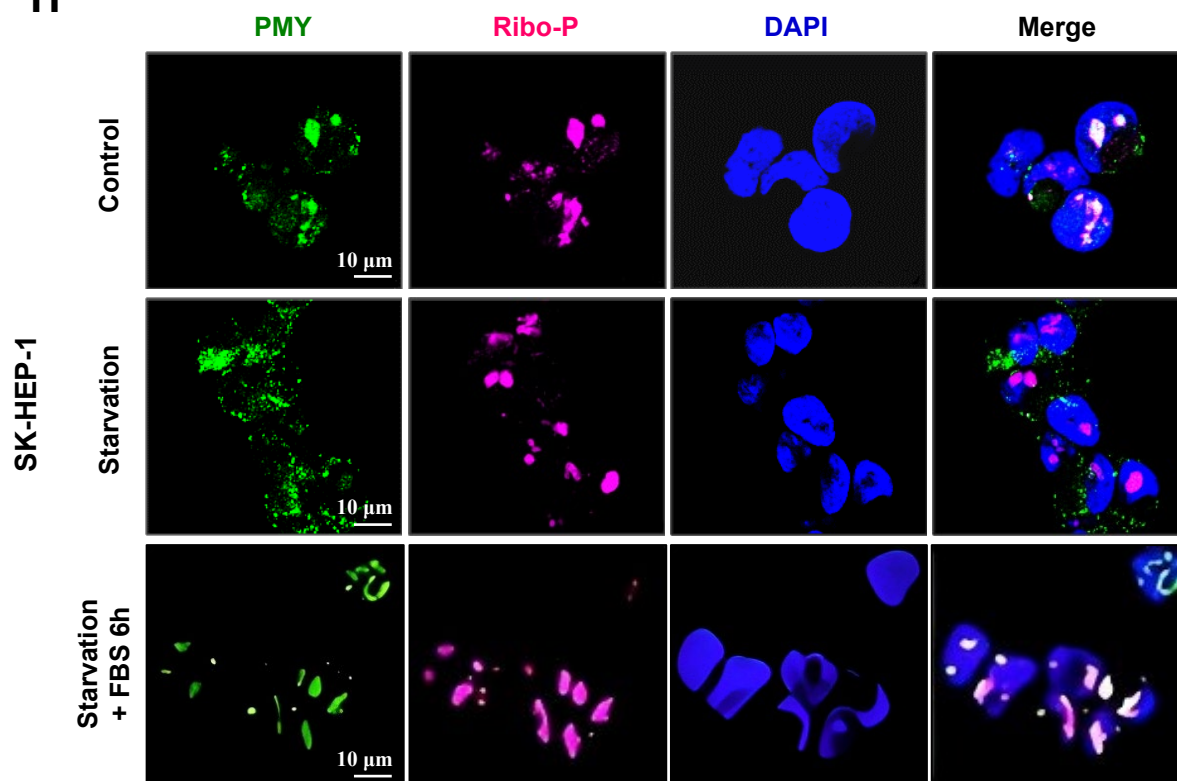

**Figure S3. Nuclear translation detected by NRPM in various malignant cancer cell lines with or without serum starvation.**

Starvation + FBS 6 h: cells were treated with serum starvation for 48 hours prior to FBS re-supplementation for 6 hours.



# Figure S3

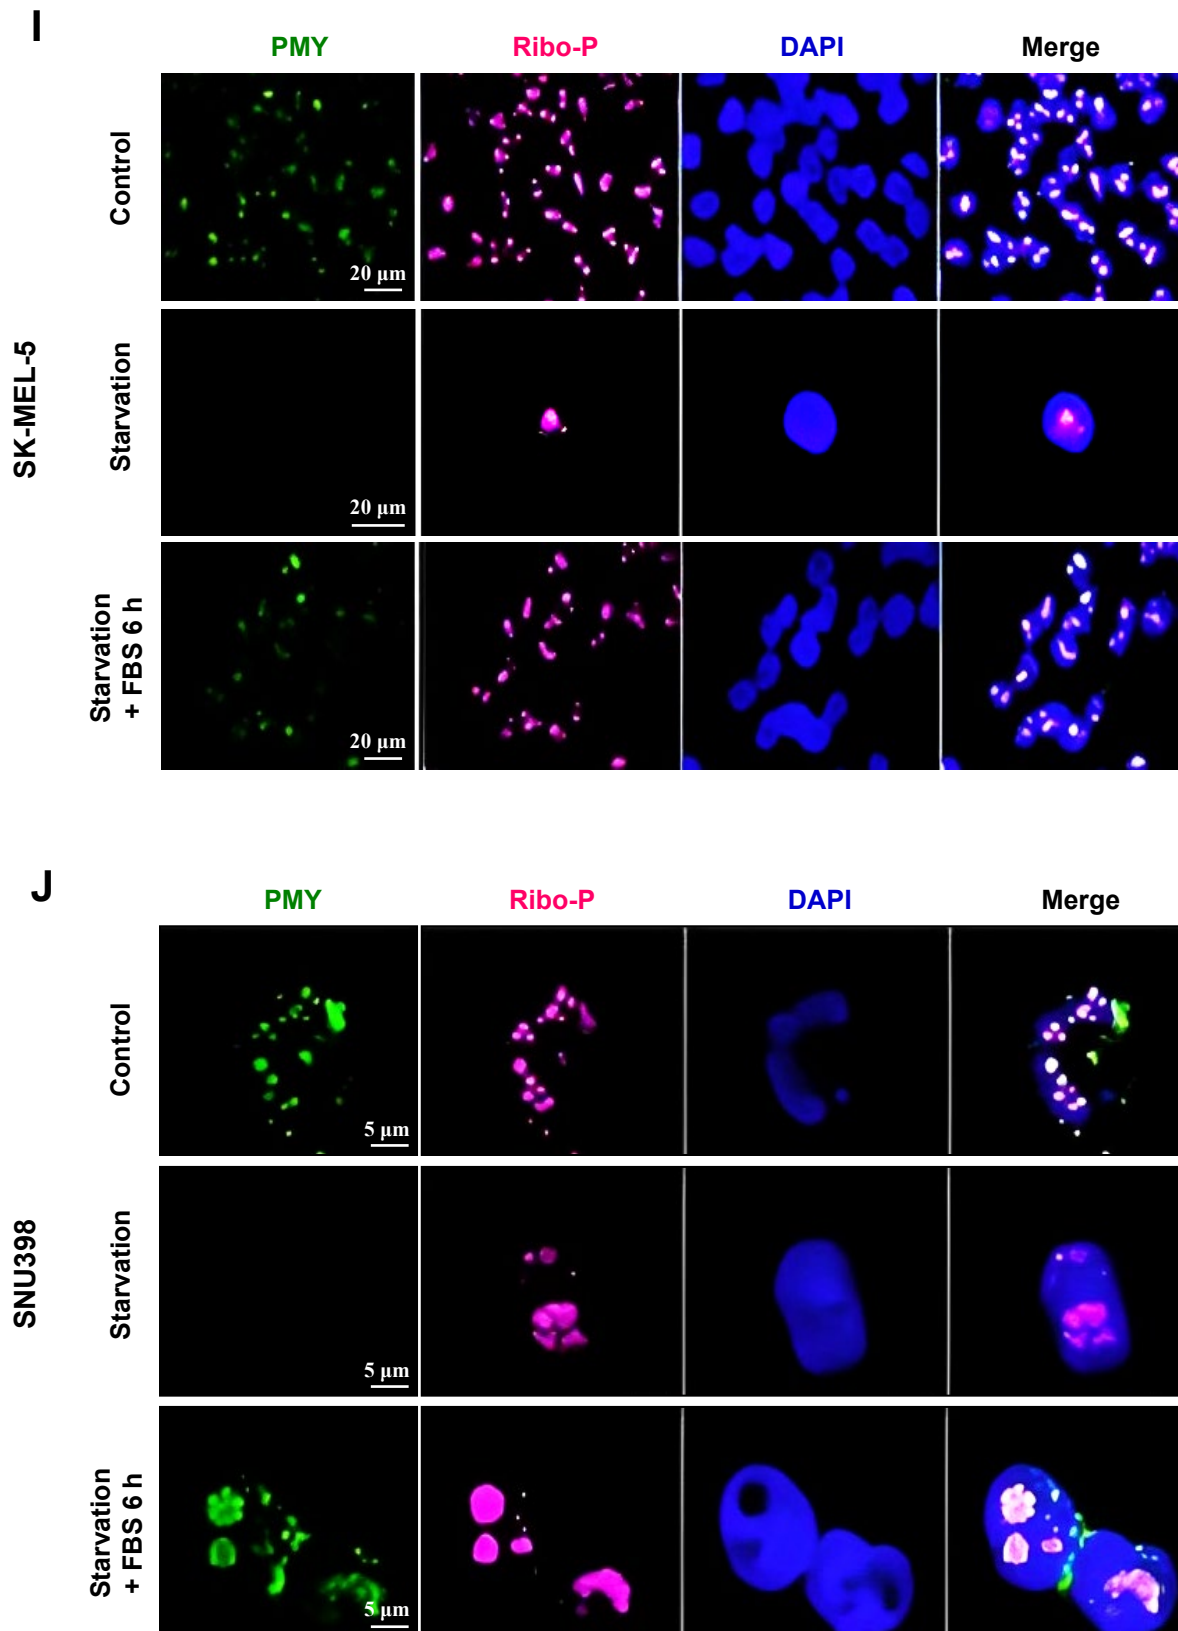

**Figure S3. Nuclear translation detected by NRPM in various malignant cancer cell lines with or without serum starvation.**

Starvation + FBS 6 h: cells were treated with serum starvation for 48 hours prior to FBS re-supplementation for 6 hours.

# Figure S3

## K

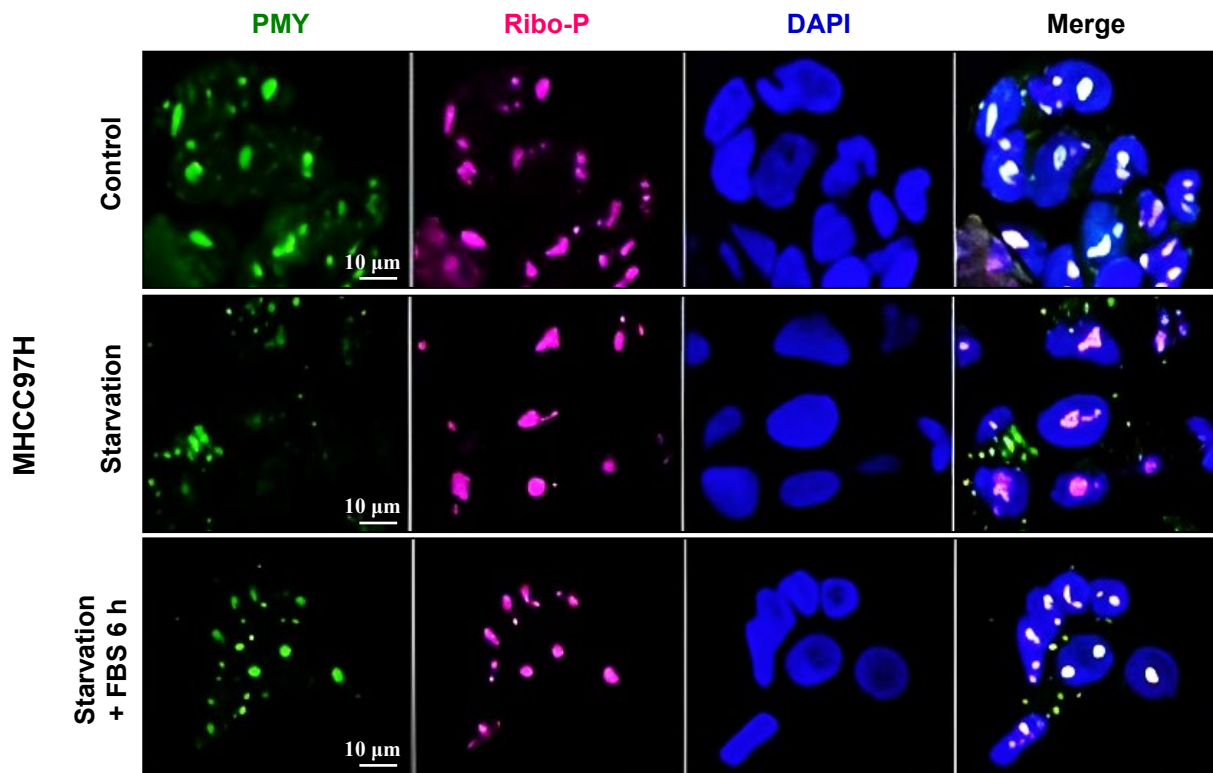

**Figure S3. Nuclear translation detected by NRPM in various malignant cancer cell lines with or without serum starvation.**

Starvation + FBS 6 h: cells were treated with serum starvation for 48 hours prior to FBS re-supplementation for 6 hours.

## Figure S4

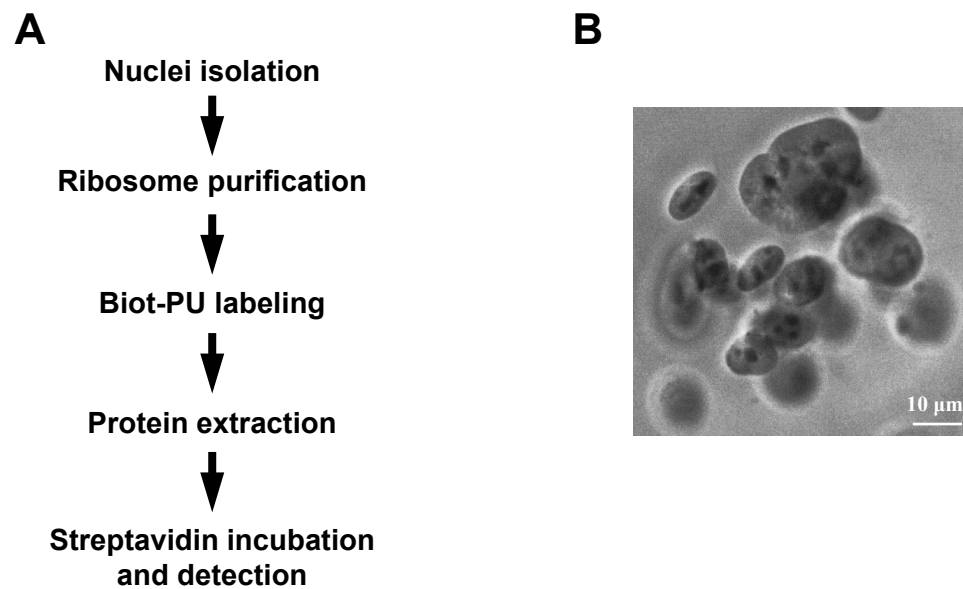

**Figure S4. Modified PUNCH-P for confirming NT.**

**(A)** Schematic outline of the nuclear PUNCH-P analysis. **(B)** Nuclei stained by trypan blue.

**Figure S5**

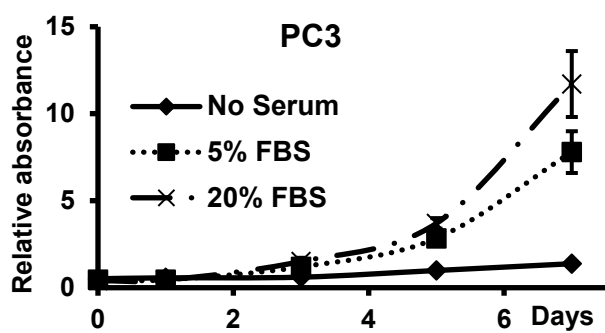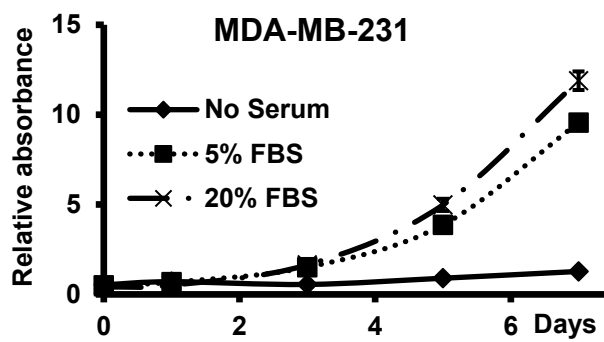

**Figure S5. MTS analysis of PC3 and MDA-MB-231 cells cultured with different concentration of fetal bovine serum (FBS) as indicated.**

## Figure S6

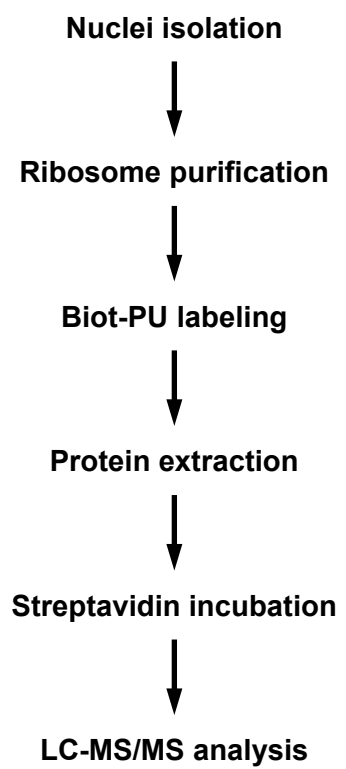

Figure S6. Schematic outline of the nuclear PUNCH-P analysis.

# Figure S7

**A**

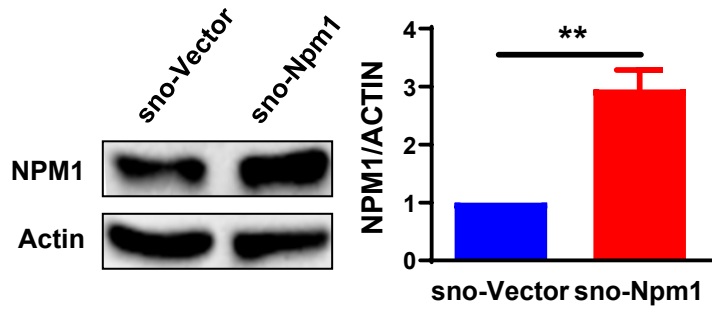

**B**

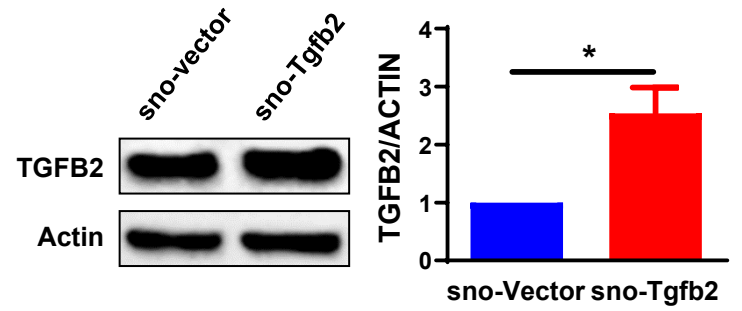

**Figure S7. Nuclear accumulation of mNpm1 and mTgfb2 transcripts increases its protein levels in PC3 cells.** PC3 cells were transfected with indicated snoVectors, the protein levels of NPM1 (**A**) and TGFB2 (**B**) in whole cells were determined by Western blotting.

**Table S1. Oligos used in the study**

| <b>Genes</b>           | <b>Forward primer</b>                | <b>Reverse primer</b>                   |
|------------------------|--------------------------------------|-----------------------------------------|
| mNpm1 cloning primers  | cccaagcttATGGAAGACTCGATGG<br>ATATGGA | acgcgtcgacTTAAAGAGATTTCTC<br>CACTGCC    |
| mTgfb2 cloning primers | ccggaattcATGCACTACTGTGTGC<br>TGAGCA  | cgggtaccTTAGCTGCATTTACAA<br>GACTTGACAAT |
| mNpm1                  | ATGGAAGACTCGATGGATATGGA              | ACCGTTCTTAATGACAACTGGTG                 |
| mTgfb2                 | CTTCGACGTGACAGACGCT                  | GCAGGGGCAGTGTAACCTTATT                  |
| hNpm1                  | ACGGTCAGTTTAGGGGCTG                  | CTGTGGAACCTTGCTACCACC                   |
| hTgfb2                 | CAGCACACTCGATATGGACCA                | CCTCGGGCTCAGGATAGTCT                    |
| hGapdh                 | ACCACTGACACGTTGGCAGT                 | ACAGCCTCAAGATCATCAGCAA                  |
| hNEAT1                 | GGAGGGCCGGGAGGGCTAAT                 | CGGTCAGCCCCGTCGAGCTA                    |

**Table S2. Differentially translated proteins between PC3 cells and nuclei as determined by PUNCH-P analysis**

| Protein  | N-1 | N-2 | N-3 | W-1 | W-2 | W-3 | N-T | W-T | N/W | P Value | Reference                                          |
|----------|-----|-----|-----|-----|-----|-----|-----|-----|-----|---------|----------------------------------------------------|
| TOP2A    | 44  | 59  | 56  | 0   | 0   | 0   | 159 | 0   | 0   | 0.000   | Nat Rev Cancer. 2009;9(5):338-50                   |
| CKAP4    | 44  | 58  | 30  | 0   | 0   | 0   | 132 | 0   | 0   | 0.006   | J Clin Invest. 2016;126(7):2689-705                |
| GNL3     | 35  | 33  | 28  | 0   | 0   | 0   | 96  | 0   | 0   | 0.000   | Cancer Lett. 2017;388:220-229.                     |
| ATAD3A   | 32  | 28  | 23  | 0   | 0   | 0   | 83  | 0   | 0   | 0.000   | Oncogene. 2016;35(3):333-43.                       |
| HDLBP    | 32  | 29  | 26  | 0   | 0   | 0   | 87  | 0   | 0   | 0.000   | Nat Genet. 2014;46(9):964-72.                      |
| SCAF1    | 30  | 32  | 24  | 0   | 0   | 0   | 86  | 0   | 0   | 0.000   | Gene. 2018. pii: S0378-1119(18)30533-X.            |
| IGF2BP3  | 27  | 31  | 21  | 0   | 0   | 0   | 79  | 0   | 0   | 0.001   | Oncotarget. 2014;5(16):6832-45.                    |
| HNRNPU   | 27  | 30  | 27  | 0   | 0   | 0   | 84  | 0   | 0   | 0.000   | Oncogene. 2018;37(20):2728-2745                    |
| COPA     | 29  | 27  | 15  | 0   | 0   | 0   | 71  | 0   | 0   | 0.006   | Cancer Res. 2016; 76(13):3895-903.                 |
| PRPF4B   | 29  | 20  | 21  | 0   | 0   | 0   | 70  | 0   | 0   | 0.001   | Cancer Lett. 2013; 335(2):351-60.                  |
| RRP1B    | 26  | 22  | 28  | 0   | 0   | 0   | 76  | 0   | 0   | 0.000   | Tumour Biol. 2015; 36(2):615-21.                   |
| LUC7L2   | 21  | 27  | 25  | 0   | 0   | 0   | 73  | 0   | 0   | 0.000   | Blood Cancer J. 2013 ; 3(5): e117.                 |
| IMMT     | 25  | 20  | 15  | 0   | 0   | 0   | 60  | 0   | 0   | 0.002   | J Cell Physiol. 2016; 231(6):1364-74.              |
| DDX5     | 21  | 21  | 25  | 0   | 0   | 0   | 67  | 0   | 0   | 0.000   | Mol Cell Proteomics. 2012; 11(2):M111.011932.      |
| ATP2A2   | 25  | 18  | 13  | 0   | 0   | 0   | 56  | 0   | 0   | 0.006   | Oncol Rep. 2017; 37(5):2865-2874.                  |
| RPN1     | 21  | 19  | 20  | 0   | 0   | 0   | 60  | 0   | 0   | 0.000   | Mol Biol (Mosk). 2011; 45(2):238-48.               |
| RARS     | 21  | 19  | 12  | 0   | 0   | 0   | 52  | 0   | 0   | 0.003   | J Cell Physiol. 2005;204(1):280-5                  |
| KTN1     | 21  | 17  | 16  | 0   | 0   | 0   | 54  | 0   | 0   | 0.000   | Neuro Oncol. 2015; 17(10):1365-73.                 |
| DDX54    | 21  | 16  | 14  | 0   | 0   | 0   | 51  | 0   | 0   | 0.001   | Front Oncol. 2021 Apr 21;11:650360.                |
| SRP72    | 17  | 19  | 10  | 0   | 0   | 0   | 46  | 0   | 0   | 0.005   | J Mol Cell Biol. 2017; 9(3): 220–230.              |
| RRP1     | 11  | 14  | 18  | 0   | 0   | 0   | 43  | 0   | 0   | 0.002   | PLoS Genet. 2007; 3(11):e214.                      |
| ABCF2    | 15  | 10  | 15  | 0   | 0   | 0   | 40  | 0   | 0   | 0.001   | Mol Carcinog. 2017; 56(6):1543-1553.               |
| CLTC     | 8   | 15  | 9   | 0   | 0   | 0   | 32  | 0   | 0   | 0.008   | Genes Chromosomes Cancer. 2014; 53(1):78-89.       |
| PHB      | 12  | 14  | 7   | 0   | 0   | 0   | 33  | 0   | 0   | 0.006   | J Exp Clin Cancer Res. 2018 Feb 7;37(1):21         |
| DHX30    | 14  | 9   | 8   | 0   | 0   | 0   | 31  | 0   | 0   | 0.005   | Cancers (Basel). 2021 Aug 31;13(17):4412.          |
| RBM39    | 10  | 11  | 14  | 0   | 0   | 0   | 35  | 0   | 0   | 0.001   | Cell Oncol (Dordr). 2012; 35(4):293-300.           |
| SRP68    | 14  | 10  | 4   | 0   | 0   | 0   | 28  | 0   | 0   | 0.033   | J Mol Cell Biol. 2017; 9(3): 220–230.              |
| MKI67    | 14  | 12  | 12  | 0   | 0   | 0   | 38  | 0   | 0   | 0.000   | J Clin Pathol. 2013; 66(6):512-6.                  |
| PARP1    | 14  | 12  | 13  | 0   | 0   | 0   | 39  | 0   | 0   | 0.000   | Oncotarget. 2015; 6(42):44819-31.                  |
| SRRM1    | 9   | 13  | 10  | 0   | 0   | 0   | 32  | 0   | 0   | 0.001   | EBioMedicine. 2020 Jan;51:102547.                  |
| GTPBP4   | 11  | 12  | 11  | 0   | 0   | 0   | 34  | 0   | 0   | 0.000   | Biomark Insights. 2017; 12:1177271917730557.       |
| AHNAK    | 11  | 12  | 11  | 0   | 0   | 0   | 34  | 0   | 0   | 0.000   | Oncogene. 2014; 33(38):4675-84.                    |
| FLNB     | 12  | 10  | 9   | 0   | 0   | 0   | 31  | 0   | 0   | 0.000   | J Mol Biomark Diagn. 2017; 8(2): 323.              |
| FTSJ3    | 11  | 12  | 9   | 0   | 0   | 0   | 32  | 0   | 0   | 0.000   | RNA Biol. 2020 Apr;17(4):474-486.                  |
| SEC61B   | 7   | 11  | 10  | 0   | 0   | 0   | 28  | 0   | 0   | 0.001   | Clin Chim Acta. 2011;412(11-12):887-93             |
| EPRS     | 11  | 6   | 11  | 0   | 0   | 0   | 28  | 0   | 0   | 0.005   | Oncotarget. 2016; 7(43):69592-69605                |
| ATP1A1   | 10  | 7   | 10  | 0   | 0   | 0   | 27  | 0   | 0   | 0.001   | Oncotarget. 2016; 7(51):85244-85258                |
| DDX18    | 8   | 5   | 10  | 0   | 0   | 0   | 23  | 0   | 0   | 0.006   | Oncogene. 2015; 34(29):3871-80                     |
| MYBBP1A  | 9   | 7   | 5   | 0   | 0   | 0   | 21  | 0   | 0   | 0.004   | Cancer Lett. 2015; 358(2):191-199                  |
| SEC63    | 9   | 9   | 7   | 0   | 0   | 0   | 25  | 0   | 0   | 0.000   | Scand J Gastroenterol. 2013; 48(3):344-51          |
| STAU1    | 7   | 9   | 5   | 0   | 0   | 0   | 21  | 0   | 0   | 0.004   | Cell Death Dis. 2017; 8(6):e2837                   |
| DDX3X    | 9   | 9   | 3   | 0   | 0   | 0   | 21  | 0   | 0   | 0.025   | Cancer Res. 2016, 76(21): 6340-50.                 |
| SRSF11   | 9   | 8   | 9   | 0   | 0   | 0   | 26  | 0   | 0   | 0.000   | Cancer Res. 2013, 73(9): 2817-28.                  |
| PTBP1    | 5   | 9   | 9   | 0   | 0   | 0   | 23  | 0   | 0   | 0.005   | Oncogenesis. 2014; 3: e84.                         |
| PPAN     | 7   | 9   | 7   | 0   | 0   | 0   | 23  | 0   | 0   | 0.000   | Biochim Biophys Acta Mol Cell Res.2019;(5):882-95. |
| MARS     | 5   | 9   | 7   | 0   | 0   | 0   | 21  | 0   | 0   | 0.004   | BMC Cancer. 2017 Jul 5;17(1):467                   |
| HIST1H1E | 9   | 6   | 3   | 0   | 0   | 0   | 18  | 0   | 0   | 0.026   | Bioinformatics. 2015;31(22):3561-8                 |
| STAU2    | 8   | 7   | 7   | 0   | 0   | 0   | 22  | 0   | 0   | 0.000   | Oncotarget. 2018; 9(35): 24140-24154.              |
| LUC7L3   | 8   | 7   | 8   | 0   | 0   | 0   | 23  | 0   | 0   | 0.000   | Clin Cancer Res. 2014;20(15):4129-40               |



|          |     |     |     |    |   |   |     |    |      |       |                                               |
|----------|-----|-----|-----|----|---|---|-----|----|------|-------|-----------------------------------------------|
| DDX52    | 8   | 8   | 8   | 0  | 0 | 0 | 24  | 0  | 0    | 0.000 | Bioengineered. 2021; 12(1):3539-3549.         |
| TTC37    | 4   | 7   | 8   | 0  | 0 | 0 | 19  | 0  | 0    | 0.006 |                                               |
| EIF2AK2  | 5   | 5   | 7   | 0  | 0 | 0 | 17  | 0  | 0    | 0.001 | Mol Med Rep. 2017;16(5): 7585-7590.           |
| ITGB1    | 7   | 6   | 5   | 0  | 0 | 0 | 18  | 0  | 0    | 0.000 | Sci Rep. 2018;8(1):2338                       |
| QSOX1    | 7   | 6   | 4   | 0  | 0 | 0 | 17  | 0  | 0    | 0.003 | Oncotarget. 2015; 6(21): 18418-28.            |
| HSPA1A   | 4   | 4   | 7   | 0  | 0 | 0 | 15  | 0  | 0    | 0.007 | Cancer Lett. 2012;317(2):157-64               |
| LRPPRC   | 2   | 5   | 7   | 0  | 0 | 0 | 14  | 0  | 0    | 0.033 | Cancer. 2014;120(8):1228-36                   |
| NOMO1    | 5   | 2   | 7   | 0  | 0 | 0 | 14  | 0  | 0    | 0.033 | Oncotarget. 2017;8(15):24429-24436            |
| NUP205   | 6   | 2   | 6   | 0  | 0 | 0 | 14  | 0  | 0    | 0.025 | Epigenetics Chromatin. 2016; 9-54.            |
| PTPLAD1  | 6   | 5   | 4   | 0  | 0 | 0 | 15  | 0  | 0    | 0.001 | Int J Cancer. 2012;131(11):2499-508           |
| REXO4    | 6   | 3   | 4   | 0  | 0 | 0 | 13  | 0  | 0    | 0.008 | Cancer Genet. 2016; 209(6): 251-7.            |
| PGAM5    | 4   | 2   | 6   | 0  | 0 | 0 | 12  | 0  | 0    | 0.026 | Nat Commun. 2015;6:8371.                      |
| ZC3HAV1  | 4   | 6   | 3   | 0  | 0 | 0 | 13  | 0  | 0    | 0.008 | Nat Commun. 2014;5:5362                       |
| EEF1D    | 2   | 6   | 4   | 0  | 0 | 0 | 12  | 0  | 0    | 0.026 | J Exp Clin Cancer Res. 2018; 37(1):50.        |
| DDX46    | 5   | 6   | 2   | 0  | 0 | 0 | 13  | 0  | 0    | 0.023 | Oncol Res. 2017; 25(3): 417-425.              |
| CDKN2A   | 4   | 6   | 2   | 0  | 0 | 0 | 12  | 0  | 0    | 0.026 | Clin Cancer Res. 2014;20(6):1676-86.          |
| DKK1     | 6   | 5   | 2   | 0  | 0 | 0 | 13  | 0  | 0    | 0.023 | Oncotarget. 2015; 6(32): 32410-25.            |
| SMARCA4  | 6   | 4   | 2   | 0  | 0 | 0 | 12  | 0  | 0    | 0.026 | Cancer Res. 2014; 74(22): 6486-6498.          |
| EIF3E    | 5   | 4   | 6   | 0  | 0 | 0 | 15  | 0  | 0    | 0.001 | Nature. 2018;561(7724):556-560                |
| HNRNPK   | 5   | 6   | 5   | 0  | 0 | 0 | 16  | 0  | 0    | 0.000 | Oncotarget. 2017; 8(61): 103364-103374.       |
| EIF3A    | 4   | 6   | 2   | 0  | 0 | 0 | 12  | 0  | 0    | 0.026 | Cell Oncol (Dordr). 2014 , 37(4): 253-67.     |
| RBM34    | 2   | 5   | 4   | 0  | 0 | 0 | 11  | 0  | 0    | 0.014 | J Clin Transl Hepatol.2023, 28;11(2):369-381. |
| LGALS3BP | 2   | 5   | 4   | 0  | 0 | 0 | 11  | 0  | 0    | 0.014 | Int J Oncol. 2016;49(1):265-75                |
| EFTUD2   | 4   | 5   | 3   | 0  | 0 | 0 | 12  | 0  | 0    | 0.002 | Cancer Med. 2015;4(2):268-77                  |
| TGFB2    | 2   | 4   | 5   | 0  | 0 | 0 | 11  | 0  | 0    | 0.014 | Nat Cell Biol. 2013;15(11):1351-6             |
| SPTAN1   | 4   | 5   | 3   | 0  | 0 | 0 | 12  | 0  | 0    | 0.002 | Oncotarget. 2016; 8(35): 58098-58107.         |
| LDHA     | 2   | 5   | 3   | 0  | 0 | 0 | 10  | 0  | 0    | 0.019 | Tumour Biol. 2015 ; 36(10): 8093-100.         |
| SMC2     | 4   | 2   | 2   | 0  | 0 | 0 | 8   | 0  | 0    | 0.016 | APMIS. 2014; 122(6): 499-504.                 |
| MBOAT7   | 4   | 3   | 2   | 0  | 0 | 0 | 9   | 0  | 0    | 0.007 | Sci Rep. 2017; 7(1): 4492.                    |
| TOP2B    | 3   | 1   | 4   | 0  | 0 | 0 | 8   | 0  | 0    | 0.039 | Nat Genet. 2010; 42(8): 668-75.               |
| EIF3H    | 2   | 4   | 2   | 0  | 0 | 0 | 8   | 0  | 0    | 0.016 | Carcinogenesis. 2014; 35(3): 670-82.          |
| EIF3C    | 4   | 3   | 4   | 0  | 0 | 0 | 11  | 0  | 0    | 0.000 | Med Sci Monit. 2017; 23: 4182-4191.           |
| CTNNB1   | 2   | 4   | 4   | 0  | 0 | 0 | 10  | 0  | 0    | 0.007 | Carcinogenesis. 2012;33(3):501-8              |
| COPG     | 3   | 3   | 1   | 0  | 0 | 0 | 7   | 0  | 0    | 0.025 | J Proteome Res. 2008; 7(3): 1138-50.          |
| PTGES    | 3   | 2   | 2   | 0  | 0 | 0 | 7   | 0  | 0    | 0.002 | Oncotarget. 2015;6(37):39941-59               |
| LRRCS9   | 2   | 3   | 2   | 0  | 0 | 0 | 7   | 0  | 0    | 0.002 | Onco Targets Ther. 2020 Jul 3;13:6453-6463.   |
| SQRDL    | 2   | 1   | 2   | 0  | 0 | 0 | 5   | 0  | 0    | 0.007 | Oncotarget. 2017;8(61):104508-104524          |
| USP42    | 1   | 1   | 1   | 0  | 0 | 0 | 3   | 0  | 0    | 0.000 | Oncogene. 2017;36(42):5819-5828               |
| GCN1L1   | 22  | 23  | 23  | 1  | 0 | 0 | 68  | 1  | 68.0 | 0.000 |                                               |
| LAMB3    | 16  | 20  | 13  | 0  | 0 | 1 | 49  | 1  | 49.0 | 0.001 | Cancer Res. 2016, 76(19): 5777-87.            |
| TFRC     | 22  | 30  | 26  | 2  | 0 | 0 | 78  | 2  | 39.0 | 0.000 | Ann Surg Oncol. 2006;13(7):961-6              |
| PRKDC    | 275 | 304 | 233 | 13 | 4 | 7 | 812 | 24 | 33.8 | 0.000 | Cancer Discov. 2014;4(5):592-605              |
| PDIA3    | 6   | 11  | 9   | 1  | 0 | 0 | 26  | 1  | 26.0 | 0.005 | Genet Mol Res. 2015; 14(2):6960-7.            |
| CYR61    | 12  | 8   | 5   | 0  | 1 | 0 | 25  | 1  | 25.0 | 0.018 | J Biol Chem, 2016, 291(53): 27433             |
| STT3A    | 20  | 13  | 13  | 2  | 0 | 0 | 46  | 2  | 23.0 | 0.004 | aryngoscope. 2011;121(5):983-9                |
| HP1BP3   | 35  | 42  | 35  | 3  | 0 | 2 | 112 | 5  | 22.4 | 0.000 | Mol Cell Proteomics.2014, 13(12):3236-49      |
| C3       | 23  | 23  | 18  | 0  | 0 | 3 | 64  | 3  | 21.3 | 0.000 | Cytokine. 2014; 66(1):60-8                    |
| DDX24    | 6   | 8   | 7   | 0  | 0 | 1 | 21  | 1  | 21.0 | 0.001 | Oncogene. 2016;35(4):528-36                   |
| VCL      | 11  | 8   | 9   | 0  | 2 | 0 | 28  | 2  | 14.0 | 0.001 | Am J Surg Pathol. 2014; 38(6): 858-863.       |
| HSP90B1  | 15  | 19  | 20  | 0  | 4 | 0 | 54  | 4  | 13.5 | 0.001 | PLoS One. 2012; 7(2): e30992.                 |
| HNRNPM   | 7   | 8   | 11  | 0  | 0 | 2 | 26  | 2  | 13.0 | 0.004 | Cancer Res. 2018;78(20):5780-92               |

|          |     |     |     |    |    |    |     |     |      |       |                                               |
|----------|-----|-----|-----|----|----|----|-----|-----|------|-------|-----------------------------------------------|
| MTDH     | 5   | 3   | 5   | 0  | 1  | 0  | 13  | 1   | 13.0 | 0.006 | Int J Clin Exp Med. 2015; 8(4): 4795-807.     |
| CSEIL    | 5   | 4   | 4   | 1  | 0  | 0  | 13  | 1   | 13.0 | 0.001 | Am J Surg. 2013; 206(3): 418-27.              |
| PCBP1    | 5   | 5   | 2   | 1  | 0  | 0  | 12  | 1   | 12.0 | 0.025 | Sci Rep. 2017; 7(1): 15488.                   |
| ACTN1    | 14  | 11  | 7   | 1  | 2  | 0  | 32  | 3   | 10.7 | 0.010 | PLoS One. 2015; 10(4): e0120616.              |
| SND1     | 23  | 26  | 13  | 3  | 3  | 0  | 62  | 6   | 10.3 | 0.010 | Cancer Res. 2015; 75(7): 1275-86.             |
| HNRNPR   | 2   | 3   | 4   | 0  | 0  | 1  | 9   | 1   | 9.0  | 0.016 | Aging (Albany NY). 2019, 16;11(18):7473-7491. |
| RSL1D1   | 33  | 36  | 42  | 4  | 3  | 6  | 111 | 13  | 8.5  | 0.000 | Oncol Lett. 2016; 11(4): 2839-2844.           |
| SRSF6    | 5   | 5   | 7   | 0  | 0  | 2  | 17  | 2   | 8.5  | 0.006 | Gut. 2017. pii: gutjnl-2017-314983.           |
| HSPA5    | 24  | 27  | 22  | 0  | 4  | 5  | 73  | 9   | 8.1  | 0.001 | Ann Surg Oncol. 2015; 22(3): 889-98.          |
| EEF2     | 15  | 13  | 11  | 2  | 0  | 3  | 39  | 5   | 7.8  | 0.001 | Int J Oncol. 2014; 44(5):1461-9.              |
| LCN2     | 9   | 10  | 9   | 2  | 2  | 0  | 28  | 4   | 7.0  | 0.000 | Elife. 2017;6. pii: e23242                    |
| ATP5A1   | 12  | 12  | 9   | 2  | 0  | 3  | 33  | 5   | 6.6  | 0.002 | J Neurooncol. 2016; 126(3): 405-13.           |
| EIF4G1   | 17  | 14  | 15  | 4  | 3  | 0  | 46  | 7   | 6.6  | 0.001 | PNAS. 2012; 109(46): 18767-72.                |
| SEC61A1  | 30  | 24  | 20  | 5  | 7  | 0  | 74  | 12  | 6.2  | 0.004 | J Cell Biochem. 2019 Apr;120(4):6145-6153.    |
| THBS1    | 62  | 65  | 52  | 13 | 9  | 10 | 179 | 32  | 5.6  | 0.000 | Anticancer Res. 2015; 35(4): 2071-6.          |
| HSPA6    | 9   | 12  | 9   | 3  | 3  | 0  | 30  | 6   | 5.0  | 0.005 | Int J Med Sci. 2015;12(3):256-63              |
| CXCL1    | 18  | 18  | 11  | 2  | 3  | 5  | 47  | 10  | 4.7  | 0.008 | Cancer Lett. 2015; 359(2): 335-43.            |
| NPM1     | 21  | 20  | 25  | 5  | 6  | 4  | 66  | 15  | 4.4  | 0.000 | Oncotarget. 2015; 6(25): 21443-51.            |
| KRT7     | 24  | 18  | 15  | 4  | 3  | 7  | 57  | 14  | 4.1  | 0.008 | Oncogene. 2016; 35(37): 4927-36.              |
| AKAP12   | 22  | 28  | 22  | 7  | 5  | 6  | 72  | 18  | 4.0  | 0.001 | Int J Oncol. 2018 ; 52(4): 1305-1316.         |
| SNRNP70  | 4   | 7   | 5   | 1  | 3  | 0  | 16  | 4   | 4.0  | 0.033 | Anal Cell Pathol. 2011; 34(3): 159-68.        |
| RRBP1    | 66  | 48  | 54  | 15 | 20 | 9  | 168 | 44  | 3.8  | 0.003 | Cancer Manag Res. 2018; 10: 1243-1249.        |
| FLNA     | 49  | 44  | 59  | 19 | 11 | 13 | 152 | 43  | 3.5  | 0.002 | Biomark Med. 2016; 10(7): 711-9.              |
| ILF3     | 16  | 21  | 21  | 8  | 5  | 4  | 58  | 17  | 3.4  | 0.003 | Exp Ther Med. 2010; 1(1): 187-192.            |
| DHX9     | 11  | 10  | 8   | 7  | 2  | 0  | 29  | 9   | 3.2  | 0.042 | Am J Transl Res. 2017; 9(2): 674-682.         |
| HSP90AB1 | 26  | 22  | 31  | 6  | 9  | 11 | 79  | 26  | 3.0  | 0.004 | Oncogene. 2018. PMID: 30305727                |
| ABCF1    | 5   | 4   | 3   | 2  | 1  | 1  | 12  | 4   | 3.0  | 0.016 | Curr Protein Pept Sci. 2015; 16(4): 301-9.    |
| RPL6     | 108 | 127 | 99  | 35 | 36 | 50 | 334 | 121 | 2.8  | 0.002 | PLoS One. 2011; 6(10): e26401.                |
| RPL37    | 14  | 18  | 23  | 8  | 6  | 6  | 55  | 20  | 2.8  | 0.012 | Biochim Biophys Acta. 1994; 1218: 425-8       |
| ACTB     | 68  | 51  | 39  | 15 | 19 | 25 | 158 | 59  | 2.7  | 0.021 | Clin Chim Acta. 2013; 417: 39-44              |
| MYADM    | 16  | 19  | 15  | 10 | 8  | 1  | 50  | 19  | 2.6  | 0.026 | Life Sci. 2007; 80(5): 420-9.                 |
| SRPK1    | 21  | 16  | 17  | 8  | 7  | 6  | 54  | 21  | 2.6  | 0.003 | Onco Targets Ther. 2018; 11: 1671-1681.       |
| RPS11    | 17  | 18  | 10  | 7  | 5  | 6  | 45  | 18  | 2.5  | 0.025 | PLoS One. 2015; 10(10): e0141334.             |
| RPL29    | 32  | 30  | 23  | 11 | 12 | 12 | 85  | 35  | 2.4  | 0.004 | Dis Model Mech. 2013;6(1):115-24              |
| EEF1A1   | 25  | 25  | 14  | 8  | 7  | 13 | 64  | 28  | 2.3  | 0.043 | Transl Oncol. 2018; 11(1): 125-131            |
| MYH9     | 15  | 19  | 14  | 8  | 9  | 4  | 48  | 21  | 2.3  | 0.014 | Gene. 2018; 664: 152-167                      |
| RPL19    | 45  | 37  | 38  | 15 | 18 | 22 | 120 | 55  | 2.2  | 0.003 | PLoS One.2011; 6(7): e22672.                  |
| RPL8     | 46  | 48  | 43  | 17 | 15 | 31 | 137 | 63  | 2.2  | 0.009 | Cancer Res. 2007; 67(8): 3555-9.              |
| HSPA8    | 42  | 47  | 49  | 22 | 26 | 17 | 138 | 65  | 2.1  | 0.002 | Onco Targets Ther. 2016;9:2169-79             |
| RPL7A    | 81  | 82  | 65  | 41 | 37 | 35 | 228 | 113 | 2.0  | 0.003 | Int J Oncol. 2000;16(4):757-62                |
| RPL10    | 54  | 52  | 45  | 26 | 27 | 22 | 151 | 75  | 2.0  | 0.001 | Oncotarget. 2017; 8(21): 35009-35018.         |
| HSP90AA1 | 53  | 51  | 59  | 28 | 24 | 29 | 163 | 81  | 2.0  | 0.001 | Onco Targets Ther. 2018; 11: 3013-3023.       |
| RPS25    | 27  | 25  | 25  | 13 | 12 | 15 | 77  | 40  | 1.9  | 0.000 | Oncogene. 2013;32(22):2782-91                 |
| RPL36    | 29  | 31  | 26  | 12 | 12 | 21 | 86  | 45  | 1.9  | 0.015 | Pathol Int. 2011;61(11):638-44                |
| RPL4     | 170 | 183 | 154 | 95 | 82 | 93 | 507 | 270 | 1.9  | 0.001 | Oncotarget. 2016;7(13):16217-26               |
| RPL15    | 73  | 75  | 52  | 33 | 33 | 45 | 200 | 111 | 1.8  | 0.024 | DNA Cell Biol. 2011;30(9):671-9               |
| RPL34    | 54  | 55  | 56  | 32 | 29 | 34 | 165 | 95  | 1.7  | 0.000 | Gene.2016 ; 576(1Pt3): 421-8.                 |
| RPL32    | 25  | 30  | 25  | 17 | 14 | 18 | 80  | 49  | 1.6  | 0.007 | Mol Ther Nucleic Acids. 2020, 4;21:75-85.     |
| UBA52    | 18  | 22  | 21  | 12 | 13 | 13 | 61  | 38  | 1.6  | 0.004 | Cancer Res. 1991;51(24):6677-85               |
| RPL3     | 67  | 73  | 59  | 47 | 41 | 39 | 199 | 127 | 1.6  | 0.007 | Sci Rep. 2016; 6: 38369.                      |
| RPL23    | 2   | 0   | 0   | 7  | 12 | 6  | 2   | 25  | 0.08 | 0.018 | Ann Hematol. 2012; 91(10):1547-54.            |

|        |     |     |    |     |     |     |     |     |      |       |                                          |
|--------|-----|-----|----|-----|-----|-----|-----|-----|------|-------|------------------------------------------|
| KRT6B  | 6   | 9   | 53 | 98  | 96  | 102 | 68  | 296 | 0.23 | 0.008 | Oncol Lett. 2017; 14(4): 4633–4640.      |
| KRT17  | 16  | 12  | 5  | 52  | 42  | 49  | 33  | 143 | 0.23 | 0.001 | Gastric Cancer. 2017; 20(6):948-959.     |
| RPS19  | 4   | 2   | 3  | 17  | 14  | 7   | 9   | 38  | 0.24 | 0.033 | PLoS One. 2012; 7(4):e33619.             |
| PABPC1 | 2   | 4   | 0  | 11  | 8   | 6   | 6   | 25  | 0.24 | 0.027 | Int J Clin Exp Pathol. 2015; 8:3794-802. |
| FLG2   | 2   | 2   | 2  | 7   | 7   | 6   | 6   | 20  | 0.30 | 0.000 |                                          |
| DSG1   | 7   | 9   | 4  | 22  | 25  | 19  | 20  | 66  | 0.30 | 0.002 | Pathol Res Pract. 2015; 211(3):208-13.   |
| DSP    | 23  | 28  | 19 | 73  | 68  | 63  | 70  | 204 | 0.34 | 0.000 | J Histochem Cytochem. 2017; 65:139-151   |
| KRT6A  | 5   | 6   | 19 | 24  | 28  | 32  | 30  | 84  | 0.36 | 0.024 | Pediatr Dermatol. 2016;33(3):337-42.     |
| JUP    | 10  | 10  | 12 | 37  | 26  | 18  | 32  | 81  | 0.40 | 0.042 | Toxicol Sci. 2013; 134(2):258-70.        |
| NCL    | 13  | 15  | 8  | 33  | 20  | 28  | 36  | 81  | 0.44 | 0.026 | J Exp Med. 2013; 210(5):951-68.          |
| KPRP   | 4   | 3   | 5  | 11  | 9   | 7   | 12  | 27  | 0.44 | 0.018 |                                          |
| KRT16  | 46  | 46  | 46 | 102 | 91  | 92  | 138 | 285 | 0.48 | 0.000 | PNAS. 2013; 110(48):19537-42.            |
| RPS16  | 4   | 4   | 5  | 8   | 8   | 7   | 13  | 23  | 0.57 | 0.002 | Sci Rep. 2017; 7(1):8365.                |
| KRT5   | 44  | 47  | 41 | 66  | 76  | 89  | 132 | 231 | 0.57 | 0.009 | Nat Cell Biol. 2014; 16(4):345-56.       |
| KRT14  | 118 | 122 | 95 | 178 | 181 | 192 | 335 | 551 | 0.61 | 0.002 | Nat Commun. 2016 Jun 20;7:11914          |

N: nuclei; W: whole cell; N-T: Nuclei Total; W-T: Whole cell Total; N/W: nuclei/whole cell

Proteins in RED have oncogenic activity. Proteins in BLUE display anti-tumor activity.

Proteins in BLACK mean their role in cancer have not yet determined.

**Table S3. GO analysis on proteins that are preferentially translated in the nucleus**

| Term                         | Count | %     | P value  | Genes                                                                                                                                                                                                 | Fold enrichment | FDR      |
|------------------------------|-------|-------|----------|-------------------------------------------------------------------------------------------------------------------------------------------------------------------------------------------------------|-----------------|----------|
| Translation                  | 28    | 1     | 1.27E-14 | ABCF1, RPL19, RPL15, RPL36, RPL37, EIF3A, RPL32, EIF3H, RPL6, RPL34, EIF3E, NPM1, RPL8, RPL3, RPL10, RPL7A, THBS1, MARS, PTBP1, EPRS, ILF3, RPL29, EIF4G1, RARS, RPS11, EIF2AK2, LRPPRC, UBA52        | 6.38            | 2.26E-11 |
| Peptide biosynthetic process | 28    | 0.094 | 2.24E-14 | ABCF1, RPL19, RPL15, RPL36, RPL37, EIF3A, RPL32, EIF3H, RPL6, RPL34, EIF3E, NPM1, RPL8, RPL3, RPL10, RPL7A, THBS1, MARS, PTBP1, EPRS, ILF3, RPL29, EIF4G1, RARS, RPS11, EIF2AK2, LRPPRC, UBA52        | 6.23            | 3.97E-11 |
| Amide biosynthetic process   | 29    | 0.097 | 3.85E-14 | ABCF1, RPL19, RPL15, RPL36, RPL37, EIF3A, RPL32, EIF3H, RPL6, RPL34, EIF3E, NPM1, RPL8, RPL3, RPL10, RPL7A, THBS1, CYR61, MARS, PTBP1, EPRS, ILF3, RPL29, EIF4G1, RARS, RPS11, EIF2AK2, LRPPRC, UBA52 | 5.81            | 6.82E-11 |
| Peptide metabolic process    | 28    | 0.094 | 2.75E-14 | ABCF1, RPL19, RPL15, RPL36, RPL37, EIF3A, RPL32, EIF3H,                                                                                                                                               | 5.10            | 4.88E-11 |

|                                              |    |       |          |                                                                                                                                                                                                                              |      |          |
|----------------------------------------------|----|-------|----------|------------------------------------------------------------------------------------------------------------------------------------------------------------------------------------------------------------------------------|------|----------|
|                                              |    |       |          | RPL6, RPL34, EIF3E, NPM1, RPL8, RPL3, RPL10, RPL7A, THBS1, MARS, PTBP1, EPRS, ILF3, RPL29, EIF4G1, RARS, RPS11, EIF2AK2, LRPPRC, UBA52                                                                                       |      |          |
| Cellular amide metabolic process             | 20 | 0.097 | 2.09E-11 | ABCF1, RPL19, RPL15, RPL36, RPL37, EIF3A, RPL32, EIF3H, RPL6, RPL34, EIF3E, NPM1, RPL8, RPL3, RPL10, RPL7A, THBS1, CYR61, MARS, PTBP1, EPRS, ILF3, RPL29, EIF4G1, RARS, RPS11, EIF2AK2, LRPPRC, UBA52                        | 4.48 | 3.70E-08 |
| Organonitrogen compound biosynthetic process | 32 | 0.107 | 9.56E-11 | ABCF1, RPL19, RPL15, AKAP12, RPL36, RPL37, TGFB2, EIF3A, RPL32, EIF3H, RPL6, RPL34, EIF3E, NPM1, RPL8, RPL3, RPL10, RPL7A, THBS1, CYR61, MARS, PTBP1, EPRS, ILF3, RPL29, EIF4G1, RARS, ATP5A1, RPS11, EIF2AK2, LRPPRC, UBA52 | 3.79 | 1.69E-08 |
| Gene expression                              | 67 | 0.225 | 1.64E-10 | ABCF1, RPL19, HP1BP3, RPL15, TGFB2, CTNNB1, CDKN2A, RRP1B, SND1, PCBP1, RPL10, SRRM1, DHX30, FTSJ3, AHNAK, LUC7L3, CYR61, GNL3, HIST1H1E, RRP1, PTBP1, MYH9,                                                                 | 1.99 | 2.91E-07 |

|                                             |    |       |          |                                                                                                                                                                                                                                                                                                                                                                                     |       |          |
|---------------------------------------------|----|-------|----------|-------------------------------------------------------------------------------------------------------------------------------------------------------------------------------------------------------------------------------------------------------------------------------------------------------------------------------------------------------------------------------------|-------|----------|
|                                             |    |       |          | MYADM, SRPK1,<br>HNRNPU, EIF4G1,<br>RSL1D1, RARS,<br>RBM39, RPS11,<br>EIF2AK2, MYBBP1A,<br>UBA52, LRPPRC,<br>SMARCA4, MTDH,<br>PRKDC, RPL36,<br>RPL37, HSPA1A,<br>HNRNPM, EIF3A,<br>HNRNPK, DDX46,<br>RPL32, RPL6, EIF3H,<br>RPL34, EIF3E, RPL8,<br>NPM1, RPL3,<br>SNRNP70, RPL7A,<br>THBS1, HSPA8,<br>MARS, DHX9, PHB,<br>EPRS, ILF3, DDX5,<br>RPL29, DKK1, SRSF6,<br>DDX54, DDX52 |       |          |
| RNA processing                              | 21 | 0.070 | 1.46E-07 | DHX9, RRP1, PTBP1,<br>HSPA1A, DDX5,<br>RSL1D1, HNRNPM,<br>HNRNPK, DDX46,<br>RRP1B, SRSF6,<br>SRRM1, SNRNP70,<br>RPL7A, RBM39,<br>DDX54, DHX30,<br>FTSJ3, DDX52,<br>LUC7L3, HSPA8                                                                                                                                                                                                    | 4.07  | 2.59E-04 |
| Ribonucleoprote<br>in complex<br>biogenesis | 16 | 0.054 | 2.47E-07 | RRP1, RSL1D1, PPAN,<br>EIF3A, RRP1B, EIF3H,<br>SRSF6, RPL6, EIF3E,<br>RPL34, RPL7A,<br>DHX30, DDX52,<br>LUC7L3, FTSJ3, GNL3                                                                                                                                                                                                                                                         | 5.35  | 4.37E-04 |
| Cytoplasmic<br>translation                  | 7  | 0.023 | 2.26E-06 | EIF3A, RPL6, RPL15,<br>RPL8, PTBP1, RPL36,<br>RPL29                                                                                                                                                                                                                                                                                                                                 | 17.96 | 0.004    |

**Table S4. KEGG analysis on proteins that are preferentially translated in the nucleus**

| Term                                        | Count | %     | P value  | Genes                                                                                                        | Fold enrichment | FDR      |
|---------------------------------------------|-------|-------|----------|--------------------------------------------------------------------------------------------------------------|-----------------|----------|
| Ribosome                                    | 17    | 0.057 | 1.16E-10 | RPL19, RPL15, RPL36, RPL37, RPL29, RPS25, RPL32, RPL6, RPL34, RPL8, RPL3, RPL10, RPL7A, RPL4, RPS11, UBA52   | 8.21            | 1.34E-07 |
| Protein processing in endoplasmic reticulum | 14    | 0.047 | 8.74E-08 | HSP90AB1, HSP90AA1, PDIA3, RRBP1, CKAP4, SEC63, HSP90B1, STT3A, SEC61B, RPN1, HSPA5, EIF2AK2, HSPA8, SEC61A1 | 6.80            | 1.02E-04 |
| Protein export                              | 6     | 0.020 | 8.43E-06 | SEC61B, SRP68, SRP72, HSPA5, SEC61A1, SEC63                                                                  | 20.29           | 0.001    |
| Spliceosome                                 | 10    | 0.033 | 3.65E-05 | HNRNPM, HNRNPK, DDX46, SRSF6, EFTUD2, PCBP1, SNRNP70, DDX5, HSPA8, HNRNPU                                    | 5.97            | 0.04     |
| Phagosome                                   | 7     | 0.023 | 0.011    | ACTB, SEC61B, TFRC, C3, THBS1, ITGB1, SEC61A1                                                                | 3.64            | 12.67    |
| Focal adhesion                              | 8     | 0.027 | 0.013    | ACTB, LAMB3, ACTN1, THBS1, FLNB, ITGB1, CTNNB1, VCL                                                          | 3.11            | 14.48    |
| RNA transport                               | 7     | 0.023 | 0.015    | EIF4G1, EEF1A1, EIF3A, EIF3H, NUP205, EIF3E, SRRM1                                                           | 3.46            | 15.68    |
| Bacterial invasion of epithelial cells      | 5     | 0.017 | 0.016    | ACTB, CLTC, ITGB1, CTNNB1, VCL                                                                               | 5.07            | 17.15    |
| Proteoglycans in cancer                     | 7     | 0.023 | 0.036    | ACTB, DDX5, THBS1, FLNB, ITGB1, TGFB2, CTNNB1                                                                | 2.81            | 34.71    |
| Viral carcinogenesis                        | 7     | 0.023 | 0.036    | CDKN2A, HNRNPK, DDX3X, C3, SND1, ACTN1, EIF2AK2                                                              | 2.81            | 34.71    |
